# Supplementary material
Source: HighWire-hosted journal article supplement (https://cmaj.ca/highwire/filestream/70687/field_highwire_adjunct_files/4/171391-res-2-at.pdf)
Supplement: 171391-res-2-at.pdf [file 171391-res-2-at.pdf]

**Appendix 2 (as supplied by the authors)**  
**Outcomes Coding Scheme**

*(Adapted from the “Cochrane Consumers and Communication Group” Outcomes Taxonomy)*

| <b>Outcome Category</b>                                       | <b>Outcome Subcategory</b>                                                                                                                                                                                                                      | <b>Coding</b> ( <i>outcomes as reported in included studies</i> )                                                                                                                                                                                                                                                                                                                                                                                                                                                                               |
|---------------------------------------------------------------|-------------------------------------------------------------------------------------------------------------------------------------------------------------------------------------------------------------------------------------------------|-------------------------------------------------------------------------------------------------------------------------------------------------------------------------------------------------------------------------------------------------------------------------------------------------------------------------------------------------------------------------------------------------------------------------------------------------------------------------------------------------------------------------------------------------|
| <b>Treatment outcomes</b><br><i>(Patient-level)</i>           | <b>Adverse outcomes:</b><br>Complications, complication rate; need for medical intervention (e.g., C-section); Morbidity, Mortality; Relapse; Side effects of drugs                                                                             | Diabetes complications; Behaviours related to medication safety; Mortality; Attrition.                                                                                                                                                                                                                                                                                                                                                                                                                                                          |
|                                                               | <b>Clinical assessments:</b><br>For example, wound healing (is the wound healing), symptom resolution (are symptoms being reduced/resolved)                                                                                                     | Treatment response (>50% reduction from baseline); CVD risk; Waist measurement in cm; Disease severity (COPD; CHD); Severity of symptoms; ; Severity of depression (depression score: mean/reduction PHQ-9/PAID/SCL score; changes in depression; Depression diagnosis; Depression free days ; Depression remission rate; Diabetes; Depression remission; Changes in cognitive function; Any depression treatment; Pain intensity; Change in pain severity; Change in walk test; Home visits; Telephone contact between patients and providers. |
|                                                               | <b>Physiological measures:</b><br>For example, blood pressure (BP), cell counts, blood glucose level                                                                                                                                            | Change in BP; systolic BP; Change in fasting LDL; mean HbA1c at baseline; total cholesterol; LDL/HDL/triglycerides; glucose control.                                                                                                                                                                                                                                                                                                                                                                                                            |
| <b>Health status and well being</b><br><i>(Patient-level)</i> | <b>Physical health of patient or caregiver:</b><br>Level of activities of daily living; Level of dependency; Self-care abilities, self-efficacy                                                                                                 | Self-efficacy ability; Self-management ability; Patient activation; Positive self-confidence; Goal setting; General health; Vitality; Sleep quality; Functional impairment; Health-related functional status; Overall functioning; Disability; Dyspnea-related disability; General health status; Health status rating; General health and well-being; Interference with daily activities due to arthritis;                                                                                                                                     |
|                                                               | <b>Psychological health of patient or caregiver:</b><br>Level of anxiety, depression, mood, wellbeing; Self-esteem, levels of confidence; Perceptions of coping; Psychological stress due to receiving information                              | Anxiety; BSI anxiety scores; Anxiety rate; Confidence score; Emotion; Self-reported depression; Diabetes-related emotional stress; Socioeconomic stress                                                                                                                                                                                                                                                                                                                                                                                         |
|                                                               | <b>Psychosocial outcomes:</b><br>Quality of life, life satisfaction; Family functioning; Social activity; Cost of illness (economic, social or psychological cost or personal loss to self, family or immediate community, i.e., personal cost) | Quality of life (QOL) measures (SF-12/36) to assess physical function, mental health, patient satisfaction.                                                                                                                                                                                                                                                                                                                                                                                                                                     |
| <b>Health Behaviour</b>                                       | <b>Attitudes:</b>                                                                                                                                                                                                                               | Medication safety attitude; Attitude/intention/subjective norm for healthy eating, physical activity; Diet/medication behavior.                                                                                                                                                                                                                                                                                                                                                                                                                 |

|                                                                            |                                                                                                                                                                                                                                                                                                                                          |                                                                                                                                                                                                                                                                                                                                                                                                                                             |
|----------------------------------------------------------------------------|------------------------------------------------------------------------------------------------------------------------------------------------------------------------------------------------------------------------------------------------------------------------------------------------------------------------------------------|---------------------------------------------------------------------------------------------------------------------------------------------------------------------------------------------------------------------------------------------------------------------------------------------------------------------------------------------------------------------------------------------------------------------------------------------|
| <i>(Patient-level)</i>                                                     | Attitude towards the disease, condition, treatment or health care, lay beliefs                                                                                                                                                                                                                                                           |                                                                                                                                                                                                                                                                                                                                                                                                                                             |
|                                                                            | <b>Compliance:</b><br>Acceptance of health care; Patient compliance (with treatment, medication); Self-care compliance; Factors affecting compliance; Intent to change health behaviour                                                                                                                                                  | Adherence to medication; Medication behavior; Antidepressant use; Self-reported compliance; Self-reported antidepressant use                                                                                                                                                                                                                                                                                                                |
|                                                                            | <b>Health enhancing life-style or behavior outcomes:</b><br>Diet; Exercise; Weight control; Self-monitoring (e.g., blood glucose level)                                                                                                                                                                                                  | Number of patients exercising/smoking/alcohol; Patients referred to an exercise program; Exercise routine; Healthy eating; Physical activity.                                                                                                                                                                                                                                                                                               |
|                                                                            | <b>Risk-taking behaviour:</b><br>Smoking; Alcohol consumption                                                                                                                                                                                                                                                                            | Alcohol use; Smoking.                                                                                                                                                                                                                                                                                                                                                                                                                       |
|                                                                            | <b>Use of services or interventions:</b><br>Use of services (e.g., screening or vaccination programs)                                                                                                                                                                                                                                    | Antidepressant and psychotherapy counseling; Mental health service use or specialty visit; Referred to mental health worker; Community linkages                                                                                                                                                                                                                                                                                             |
| <b>Knowledge and Understanding</b><br><i>(Patient- and Provider-level)</i> | <b>Patient Knowledge acquisition (level of knowledge or increase in knowledge about a disease, condition, procedure or treatment):</b><br>Knowledge about expected and undesired effects of treatment; Knowledge or risk, accurate risk perception; Family members level of knowledge; Changes to beliefs about disease, condition, etc. | Medication safety knowledge; Knowledge about medication                                                                                                                                                                                                                                                                                                                                                                                     |
|                                                                            | <b>Provider level of knowledge or skills:</b><br>Performance of procedures measures (number of attempts, completion, time taken)                                                                                                                                                                                                         | Proportion of deficiencies addressed by PCPs in CAD/DM management; Referred to exercise program; Performance measure: Documentation of up-to-date LDL-C result, lipid therapy started/changed if LDL-C above goal, up-to-date BP result, change in antihypertensive therapy if BP above goal, smoking status, smoking cessation medication started if active smoker, up-to-date height and weight documented; Referred to exercise program. |
| <b>Evaluation of care</b> <i>(Patient-level)</i>                           | <b>Satisfaction:</b><br>Patient satisfaction with the information provided; Satisfaction with the decision/s made; Satisfaction with care; Caregiver satisfaction; Sense of control                                                                                                                                                      | Patient satisfaction; Satisfaction in depression treatment; Content patients like/dislike about intervention; Perceived behavioural control; User acceptance; Perceived ease of use; Perceived usefulness                                                                                                                                                                                                                                   |

|                                       |                                                                                                                                                                                                                                             |                                                                                                                                                                                                                                                                                                                                                                               |
|---------------------------------------|---------------------------------------------------------------------------------------------------------------------------------------------------------------------------------------------------------------------------------------------|-------------------------------------------------------------------------------------------------------------------------------------------------------------------------------------------------------------------------------------------------------------------------------------------------------------------------------------------------------------------------------|
|                                       | <p><b>Perceptions and ratings of care or interventions:</b><br/>Training program assessment</p>                                                                                                                                             | <p>Patient perceptions of intervention; Overall usefulness of intervention to help self-manage; Value of collaborative care; Value of intervention</p>                                                                                                                                                                                                                        |
| <p><b>Skills Acquisition</b></p>      | <p><b>Self-care skills</b></p>                                                                                                                                                                                                              | <p>Self-management skills; Self-efficacy; Diabetes self-care behaviours: Exercise days, weekly glucose testing days, weekly foot inspection days, followed recommended diet, took prescribed medication; Depression self-efficacy; Overall usefulness of intervention to help self-manage</p>                                                                                 |
| <p><b>Health Service Delivery</b></p> | <p><b>Health economic outcomes:</b><br/>Costs of specific interventions (e.g., educational, medical); Costs of care (e.g., costs of in-patient care, costs of home-care); Costs of discharge planning (e.g., to hospital and community)</p> | <p>Hospital cost; medication cost; program cost; intervention cost</p>                                                                                                                                                                                                                                                                                                        |
|                                       | <p><b>Service utilization:</b><br/>Admission to hospital; Usage of specific services (e.g., use of outpatient treatment); Length of stay in hospital; Readmission rate to hospital</p>                                                      | <p>Hospitalizations; rehospitalization; Days free from hospitalization; Hospital LOS; ED visits; Number of nurse home visits; Outpatient visits; time to ED use; number of nursing visits; total healthcare appointments; total home visits; specialty and primary care visits; Feasibility of the intervention (measured by attrition rates); Mental health service use.</p> |
